# Supplementary material
Source: HighWire-hosted journal article supplement (https://srh.bmj.com/content/45/3/207)
Supplement: inline-supplementary-material-1 [file inline-supplementary-material-1.docx]

**How can we improve care for women requesting an abortion in Scotland?**

It is now 50 years since abortion was legalised in Great Britain. As part of ongoing efforts to improve care for women in Scotland today, we would like to gather views of women on what they feel could help further improve care throughout the country.

We would be grateful if you would spare a few minutes filling out this questionnaire. It should take you around **5 minutes** to complete.

You do not have to complete the questionnaire if you do not wish to do so and you can leave out any questions that you do not wish to answer. The questionnaire is completely **anonymous,** and any information collected will be kept strictly **confidential**.

Answers from all completed questionnaires will be analysed and used to help us determine potential improvements to the abortion process.

If you are willing to complete a questionnaire, please do so.

Once completed, please seal this questionnaire in the envelope provided and return it to a member of staff or put it in the box provided.

Please refer to the Participant Information Sheet for more information. If you have any questions or comments regarding this questionnaire or would like to know more about the study, please contact:

Jodie Smith (Student)

Chalmers Centre

2A Chalmers Centre

Edinburgh

EH3 9ES

[s1402187@sms.ed.ac.uk](mailto:s1402187@sms.ed.ac.uk)

Results from this study will be published in June 2018. If you are interested in viewing these findings, please visit: [www.lothiansexualhealth.scot.nhs.uk](http://www.lothiansexualhealth.scot.nhs.uk)

**1. We want to know what difficulties you may have faced in the lead up to seeking our abortion services.**

**a) From the list below, please rank the three options that most apply to you (rank 1-3, with 1 = most difficult).**

Waiting time before I could be seen at the clinic today _____

Distance that I had to travel to the clinic today _____

I had work/childcare commitments to arrange _____

I didn’t know where to find information about the abortion process _____

I was scared about what the abortion process may involve _____

Other (please tell us what) ............................................................................

**b) Clinics in England often have protesters outside. Were you aware of any outside the clinic today? (Please circle)**

Yes No

**If yes, did you find them distressing? (Please circle)**

Yes Neutral No

**2. We would like to know if any of the following made seeking our abortion service easier for you?**

The ability to phone and refer myself to the clinic for an appointment (Please circle):

**Helpful Neither Not helpful**

The information available on clinic website [www.lothiansexualhealth.scot.nhs.uk](http://www.lothiansexualhealth.scot.nhs.uk) on how to access this abortion service (Please circle):

**Helpful Neither Not helpful**

Possibility to have an early medical abortion at home (Please circle):

**Helpful Neither Not helpful**

Receiving a reminder of my appointment by text to my mobile phone (Please circle):

**Helpful Neither Not helpful**

**3. What FUTURE developments would improve the care of women seeking abortion in Scotland, in your opinion?**

**From the list below, please rank three options that most apply to you (rank 1-3, with 1 = best improvement).**

Better information (e.g. posters in pharmacies/GP waiting rooms) about

how to refer yourself for an abortion _____

Minimising waiting times to be seen at a clinic to discuss abortion _____

Option to get early medical abortion treatment from a nurse or midwife

(i.e. no need to see a doctor) _____

Option to get early medical abortion treatment from a GP surgery

(i.e. no need to attend a specialist clinic) _____

Buffer zones (set areas around the clinic that anti-abortion

protesters must stay out of) _____

Other (please tell us here what other suggestions you have):

_____________________________________________________________________

*The next few questions ask for some information about you.*

**4. What age are you?**

**____________**

**5. Have you had any children? (Please circle)**

Yes No

**6. Have you had an abortion before? (Please circle)**

Yes No

**7. Which of the following best describes your ethnic background? (Please tick)**

White (UK, Irish or any other White background)

Asian or Asian British (Bangladeshi, Indian, Pakistani or any other Asian background)

Black or Black British (African, Caribbean or any other Black background)

Mixed or any other ethnic background (Please specify) _______________________

**8. Please enter your postcode, leaving out the last 2 letters (e.g. EH14 2 or EH9 1)**

**____________**

(We would like to know the first 4 characters of your postcode so that we can link your area to other local information, for example, on local services. Please remember that your answers are confidential, and this information cannot be used to identify you.)

**If you have any other comment you would like to make, or expand on any of the answers you have given in any section of the questionnaire, please write them here:**

**Thank you for taking the time to fill in this questionnaire.**
